# Supplementary material
Source: PubMed Central journal article supplement (PMC4542041)
Supplement: ismej201547x1.pdf [file ismej201547x1.pdf]

## Supplementary Materials

The number of sequence variations among the known phage genomes can provide an estimate of the *P. acnes* phage population diversity within each skin community. We calculated the range of nucleotide variations among a given number of phage genomes. For each given number of phage genomes, subsets of the 43 unique phage strains were selected randomly and analyzed with the core SNP analysis method to calculate the number of nucleotide variations. One hundred resamplings of each subset size were calculated when applicable.

We found that the HMP sample HMP20 had 1,353 SNPs in the assembled phage metagenome. Although the number of SNPs is smaller than the range of nucleotide variation sites between any two unique phage strains (2,099 – 2,760), it is much greater than the maximum number of 14 SNPs within a single phage strain. This suggests that the *P. acnes* phage population in HMP20 may consist of more than one phage strain.

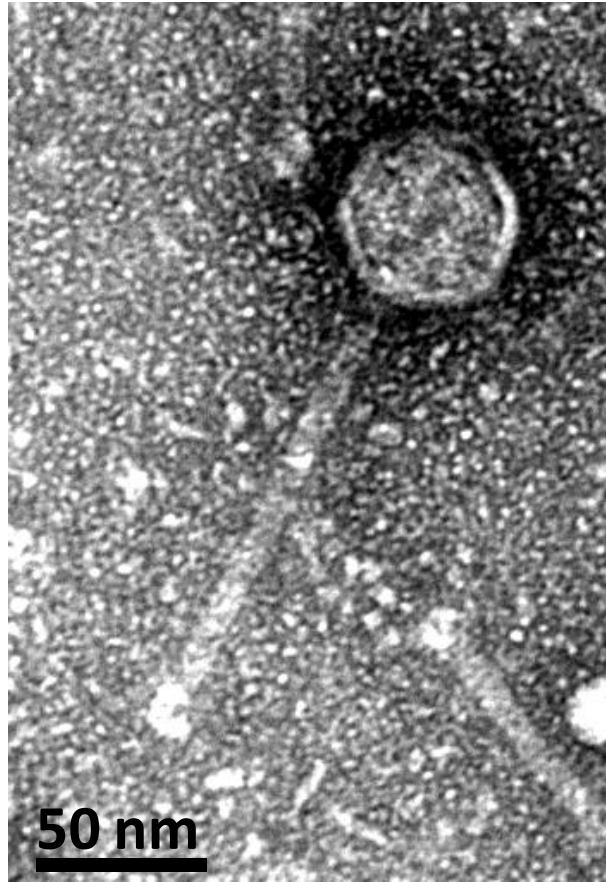

**Figure S1. *P. acnes* phage morphology.**

A representative electron micrograph of phage PHL066M04 shows that it has an icosahedral head (~50 nm in diameter) and a ~150 nm flexible tail. The phage morphology is similar to those previously described (Farrar *et al.*, 2007; Marinelli *et al.*, 2012; Lood *et al.*, 2008; Webster & Cummins, 1978).

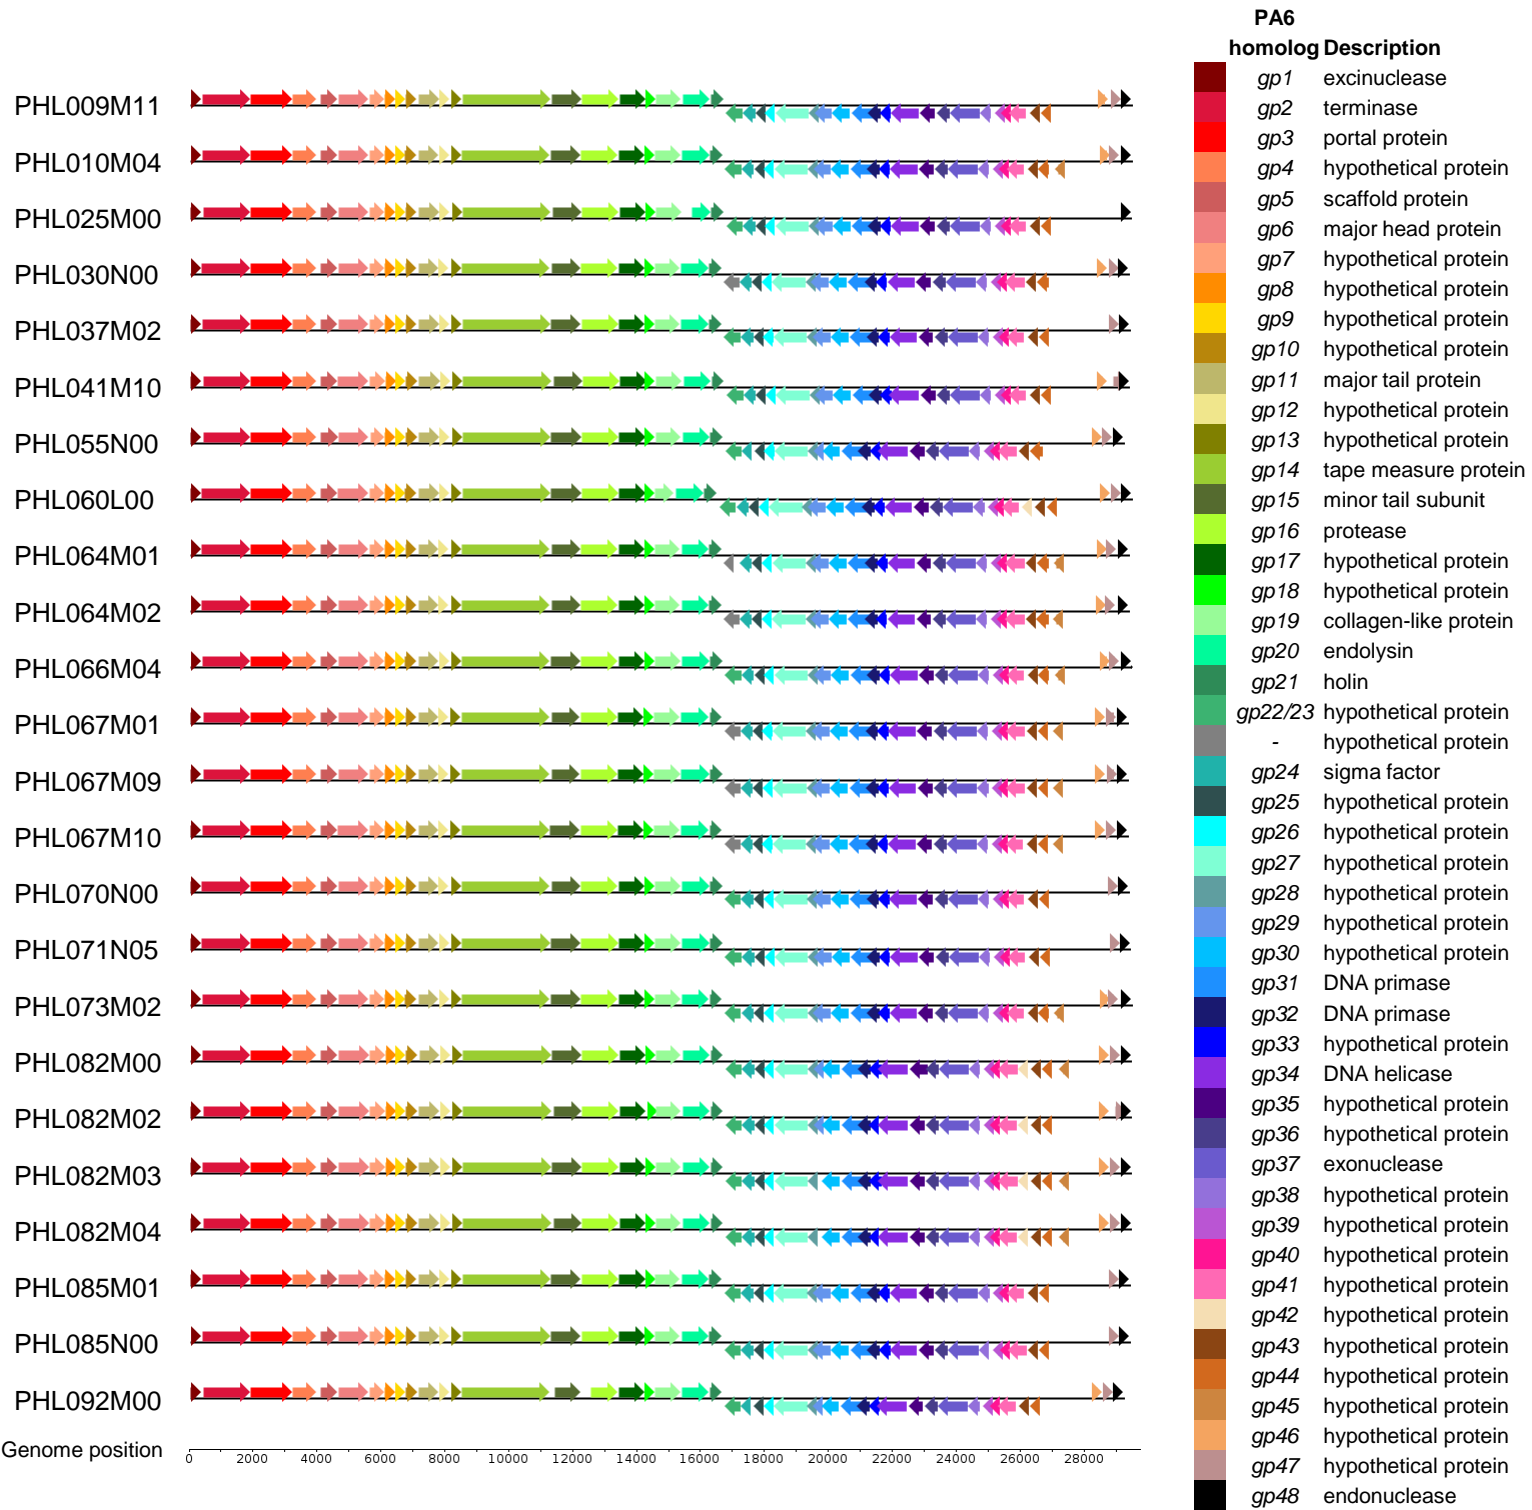

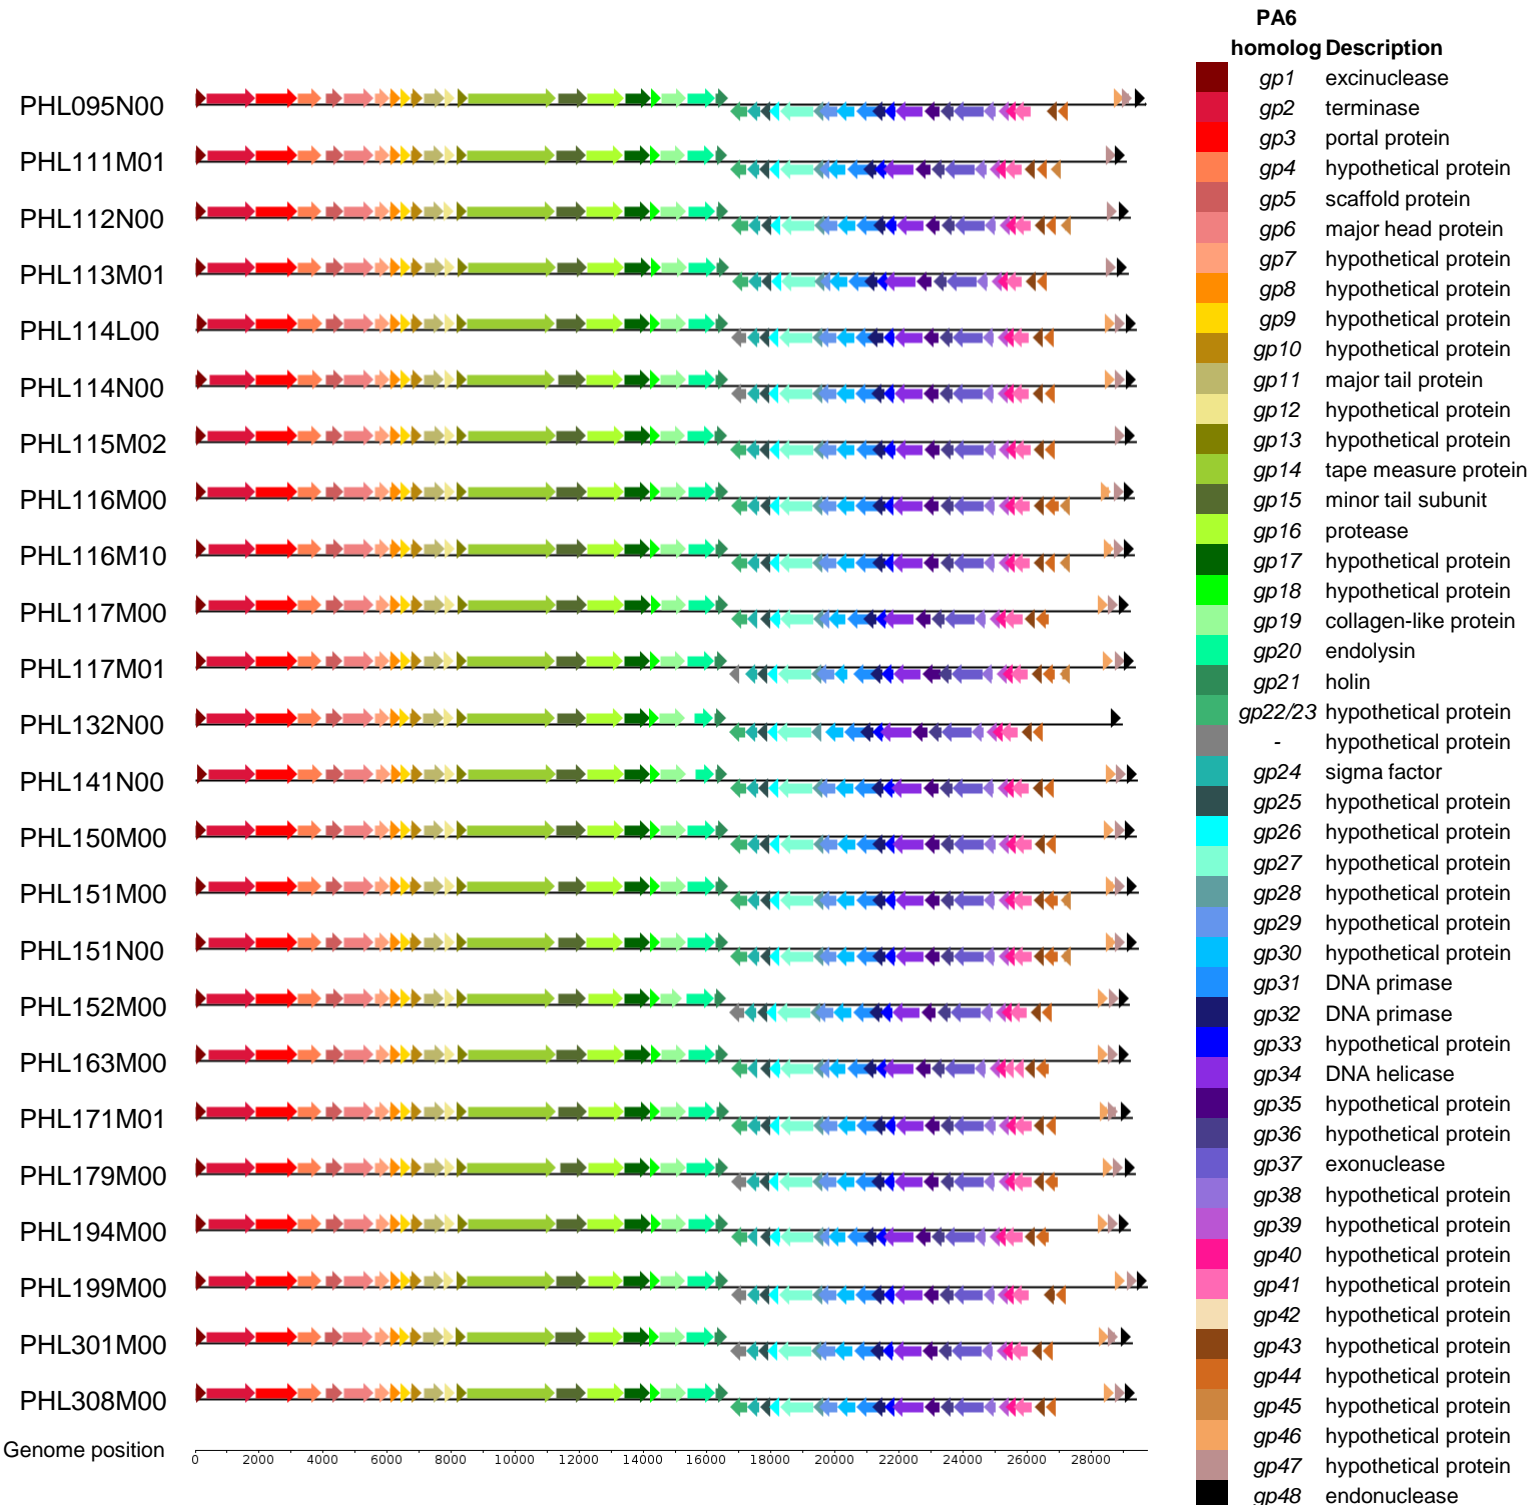

**Figure S2. Newly sequenced *P. acnes* phage genomes and annotations.**

The genome organization of all 48 phages shows that these phages are highly similar to each other. On average 45 ORFs are encoded in each phage genome. ORF color indicates the PA6 homolog described in the figure legend.

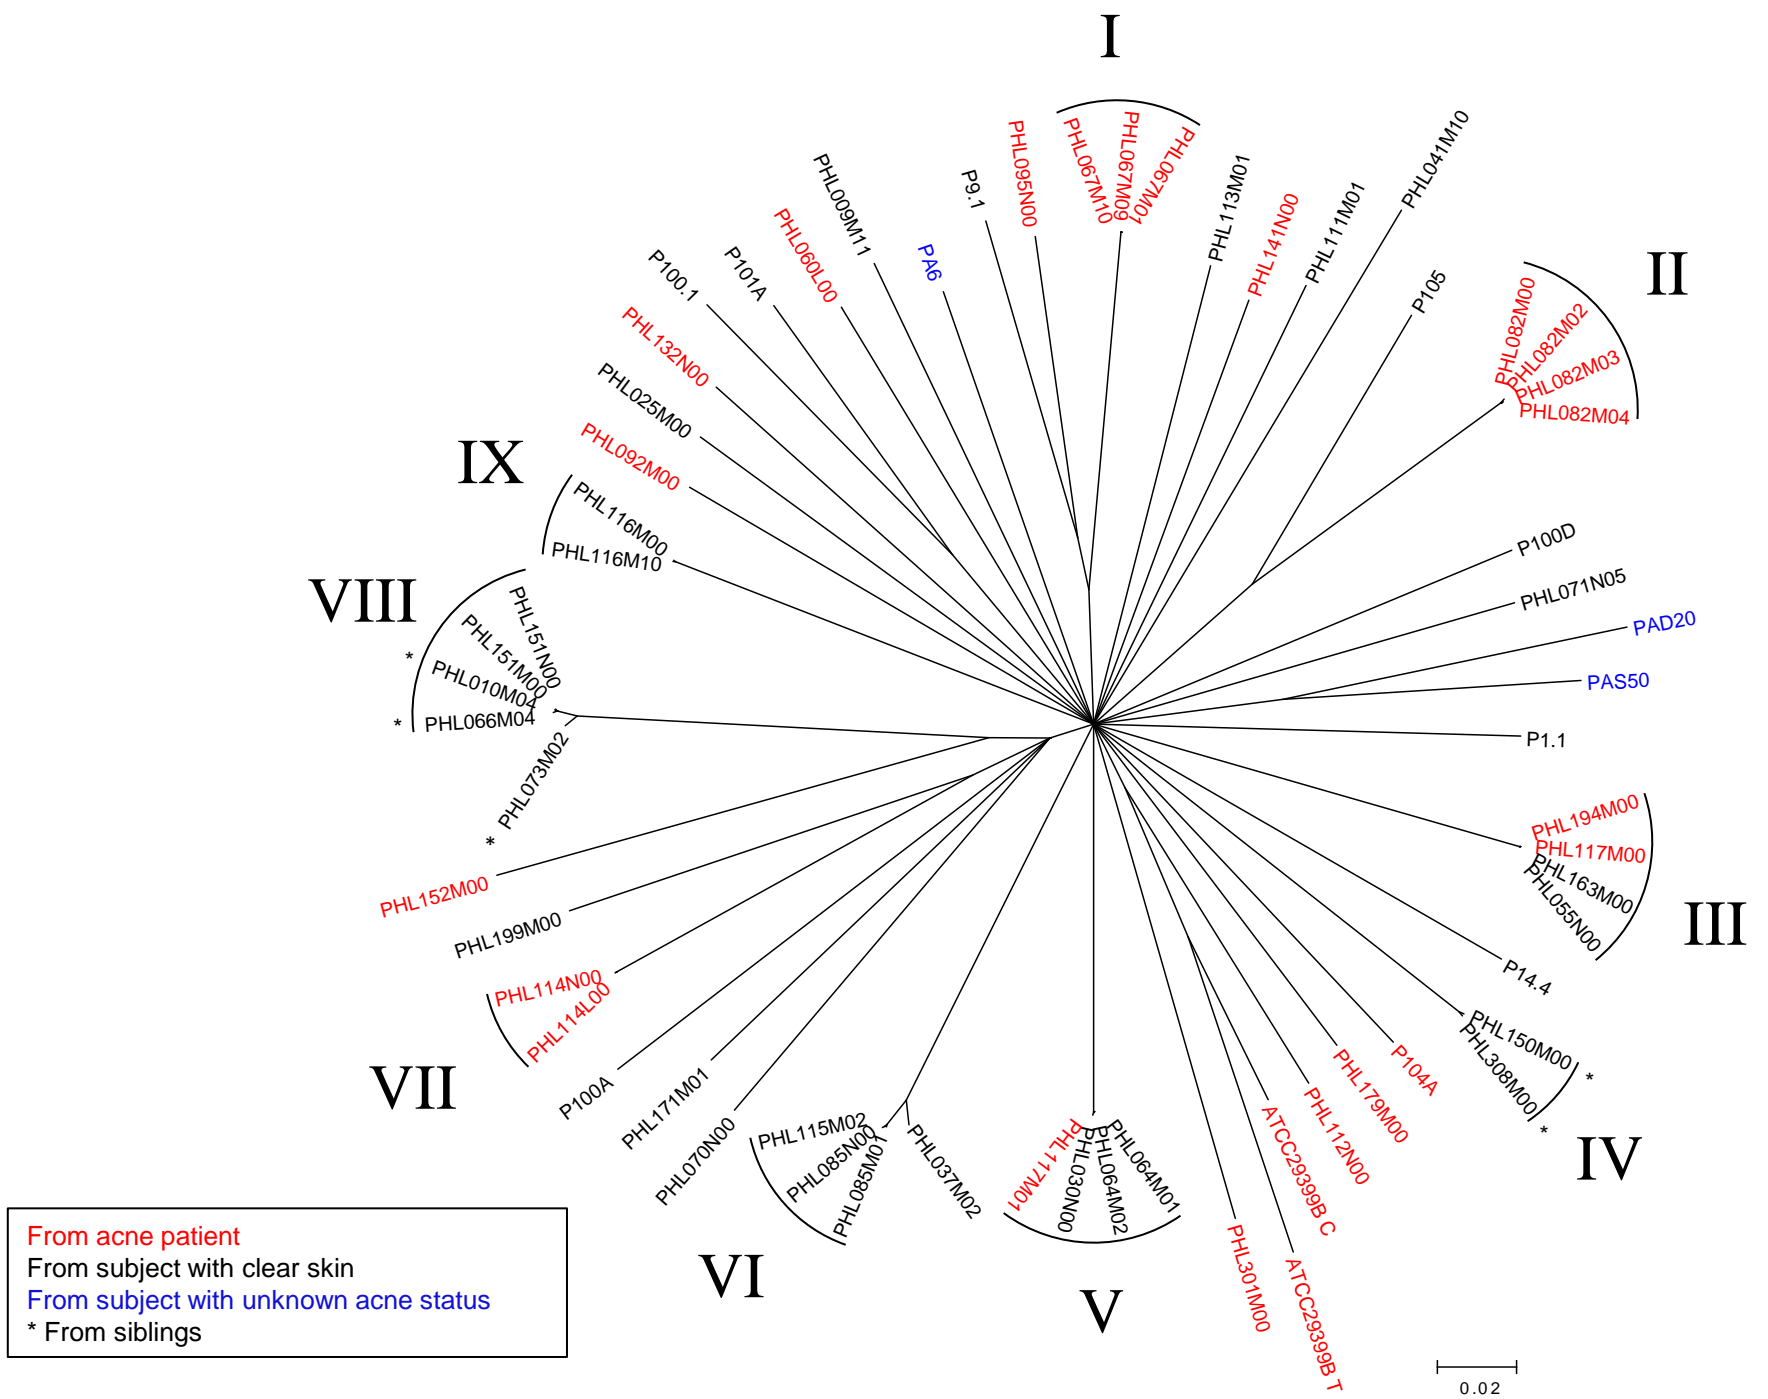

**Figure S3. Phylogenetic tree of *P. acnes* phages based on non-synonymous SNPs in the core regions.**

A phylogenetic tree was constructed from the set of non-synonymous SNPs in the core regions of the 62 sequenced phage genomes. Consistent with the tree in Figure 2, no significant phylogenetic lineages were observed. Branches with bootstrap values less than 80 (based on 1,000 resamplings) were collapsed.

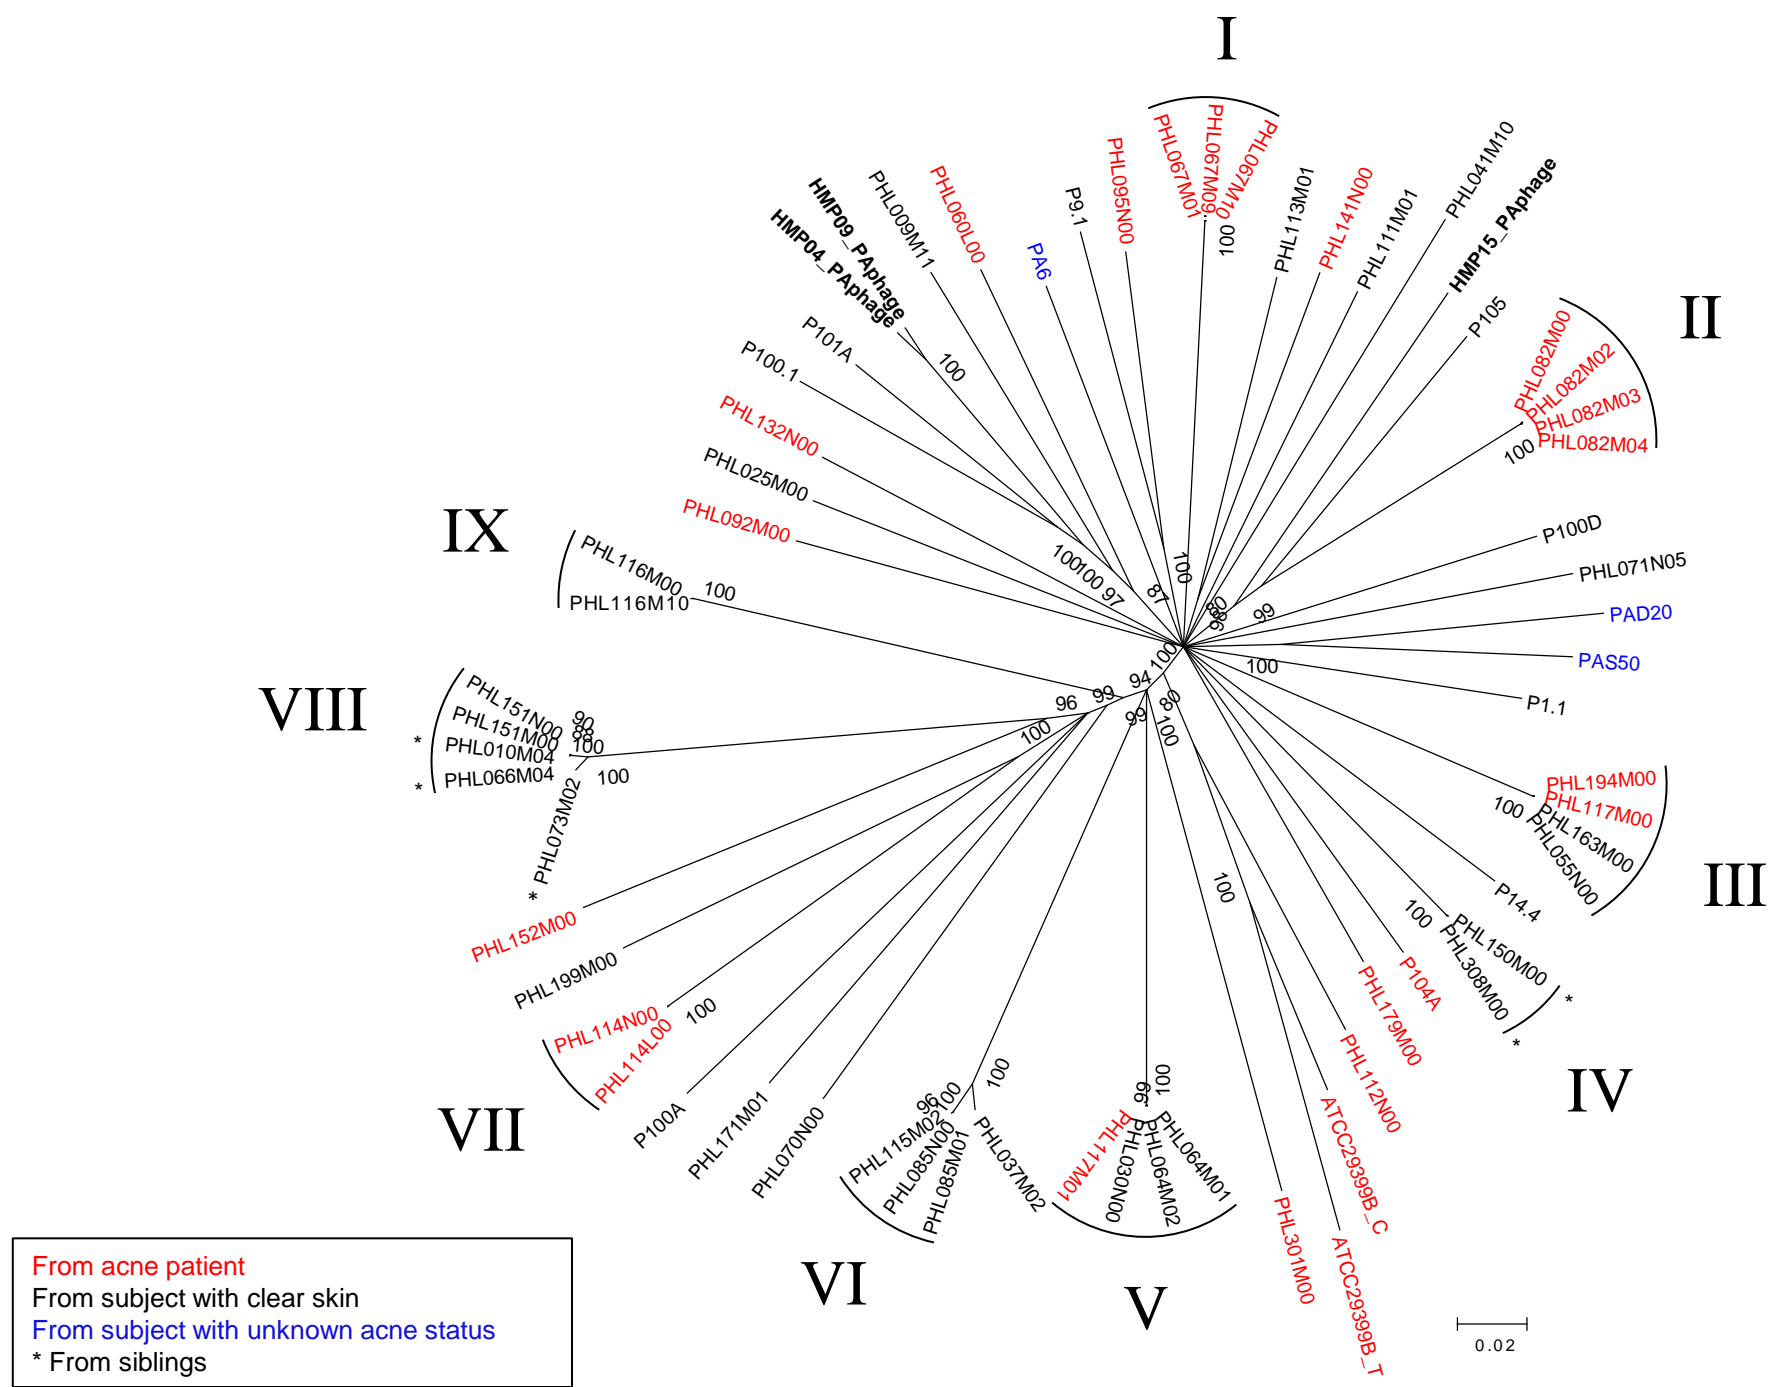

**Figure S4. The genomes of the *P. acnes* phages assembled from the HMP metagenomic data are highly similar to the known phage genomes.** High-quality drafts of *P. acnes* phage genomes assembled from the metagenomes of three HMP retroauricular samples (in bold) were included in the phylogenetic analysis of the phages. 7,270 SNPs in the core regions of the 65 genomes were used to generate the phylogenetic tree. The phages in samples HMP04 and HMP09, which were collected from the same individual, are highly similar to each other. Branches with bootstrap values less than 80 (based on 1,000 resamplings) were collapsed. Bootstrap values are displayed for the branches.

**A**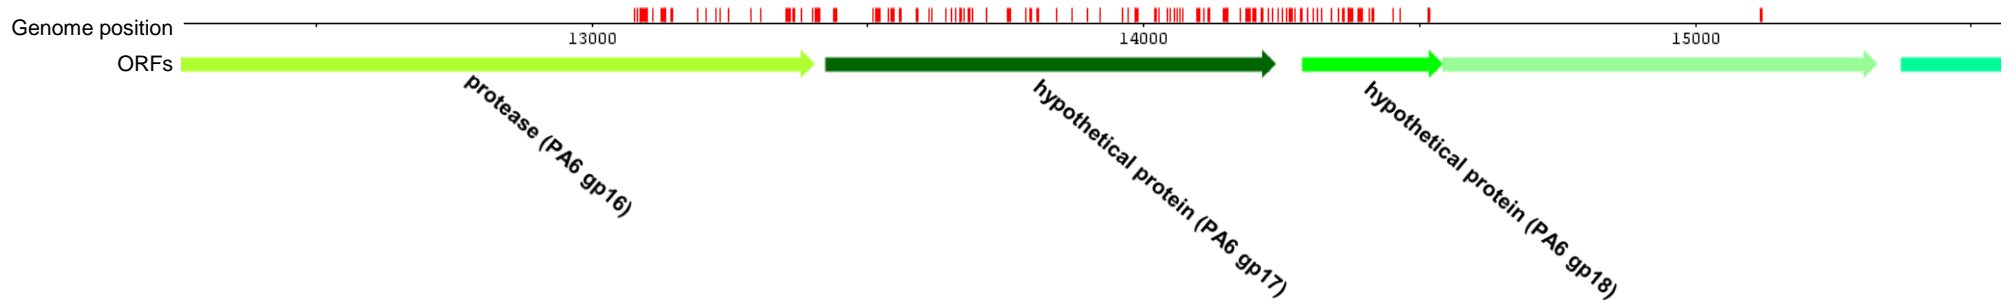**B**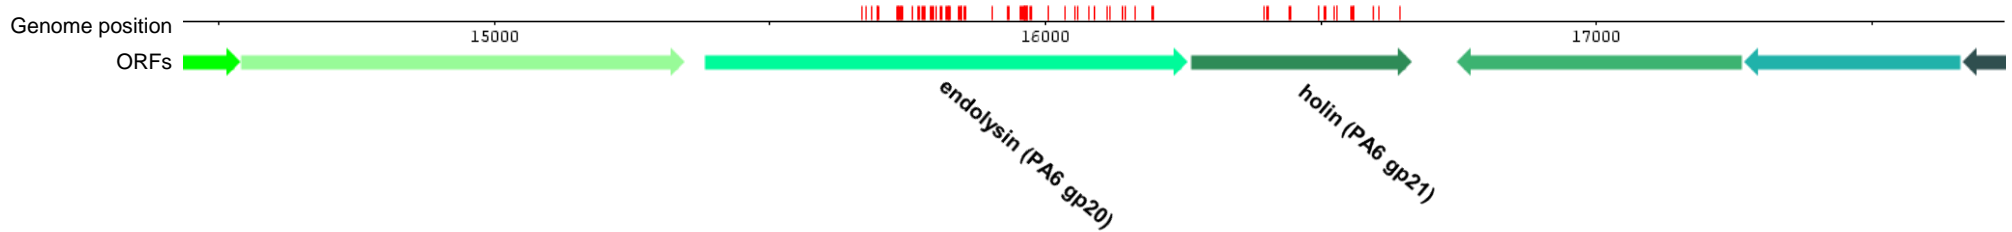

**Figure S5. Phage genes under diversification.**

(A) Sites of nucleotide variation (red) between PHL037M02 and Group VI phages (PHL115M02, PHL085M01, PHL085N00) mapped to the PHL037M02 genome. All but one of the nucleotide variations are located in the region encoding Gp16, Gp17, and Gp18. (B) Sites of nucleotide variation between PHL073M02 and Group VIII phages (PHL010M04, PHL066M04, PHL151M00, PHL151N00) mapped to the PHL073M02 genome. The nucleotide variations are primarily located in the endolysin and holin genes. Green arrows represent ORFs in each genome.

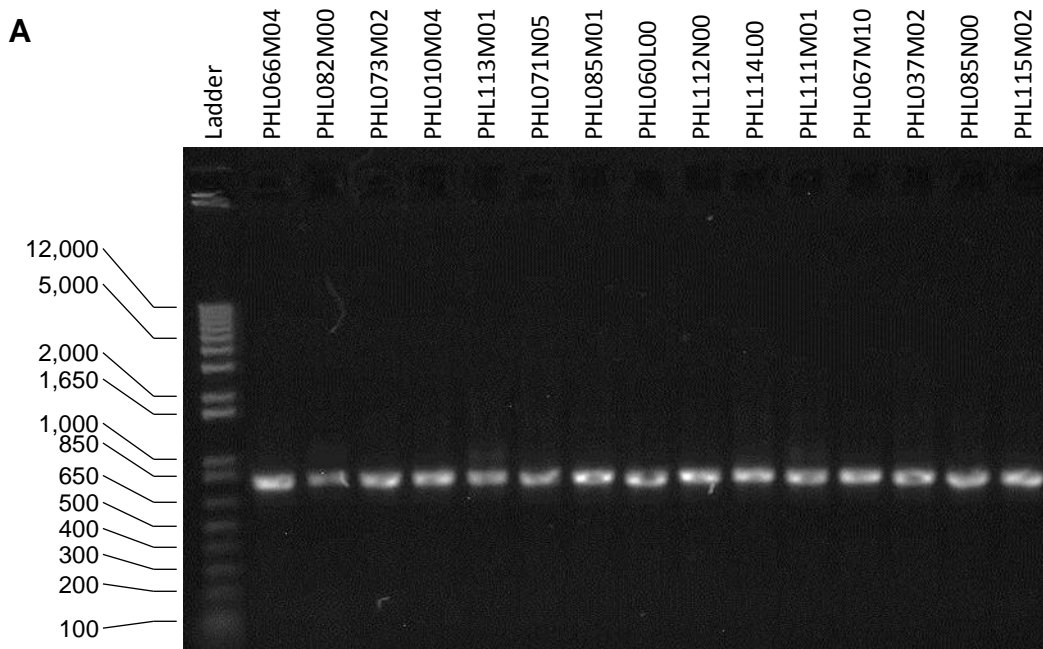

**B**

Phages used for challenge experiments

| Phage used to infect ATCC6919 previously | Passage Number | Group VI  |           |           |           |           |           |           |           |           |           |           | Group VIII |           |   |   |
|------------------------------------------|----------------|-----------|-----------|-----------|-----------|-----------|-----------|-----------|-----------|-----------|-----------|-----------|------------|-----------|---|---|
|                                          |                | PHL071N05 | PHL113M01 | PHL111M01 | PHL060L00 | PHL067M10 | PHL112N00 | PHL037Z02 | PHL115M02 | PHL085M01 | PHL114L00 | PHL073M02 | PHL010M04  | PHL066M04 |   |   |
| PHL060L00                                | 4              | R         | R         | R         | R         | R         | R         | R         | R         | R         | R         | R         | R          | R         | R | R |
| PHL112N00                                | 4              | R         | R         | R         | R         | R         | R         | R         | R         | R         | R         | R         | R          | R         | R | R |
| PHL037M02                                | 2              | R         | R         | R         | R         | R         | R         | R         | R         | R         | R         | R         | R          | R         | R | R |
| PHL073M02                                | 2              | R         | R         | R         | R         | R         | R         | R         | R         | R         | R         | R         | R          | R         | R | R |
| PHL114L00                                | 2              | R         | R         | R         | R         | R         | R         | R         | R         | R         | R         | R         | R          | R         | R | R |
| uninfected                               | -              | S         | S         | S         | S         | S         | S         | S         | S         | S         | S         | S         | S          | S         | S | S |

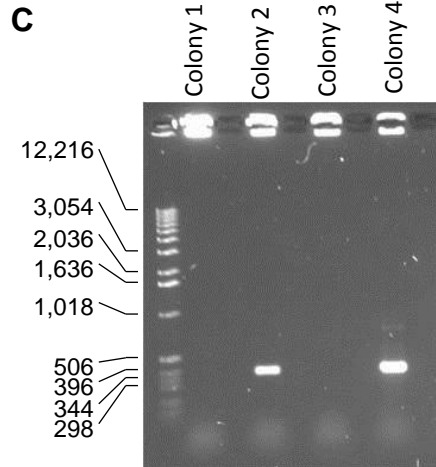

**Figure S6. Pseudolysogenic properties of *P. acnes* phages.** (A) *P. acnes* phage DNA can circularize via the 11-nt overhangs at the ends of the phage genome. Primers targeting a region spanning the two ends of the phage genome were used. A ~735 bp PCR product was amplified from all 15 phages tested. (B) *P. acnes* infected with phages gained superinfection immunity. Strain ATCC6919 infected with five different phages and passaged 2-4 times was challenged with 13 phages. 'R' indicates resistance/no lysis, and 'S' indicates susceptibility. (C) *P. acnes* phages exist in a subpopulation of re-grown *P. acnes* cultures after phage lysis. PCR amplification of the phage *gp11* gene produced the expected 437 bp product in two of four colonies from the fourth passage of an ATCC6919 culture infected with PHL060L00.



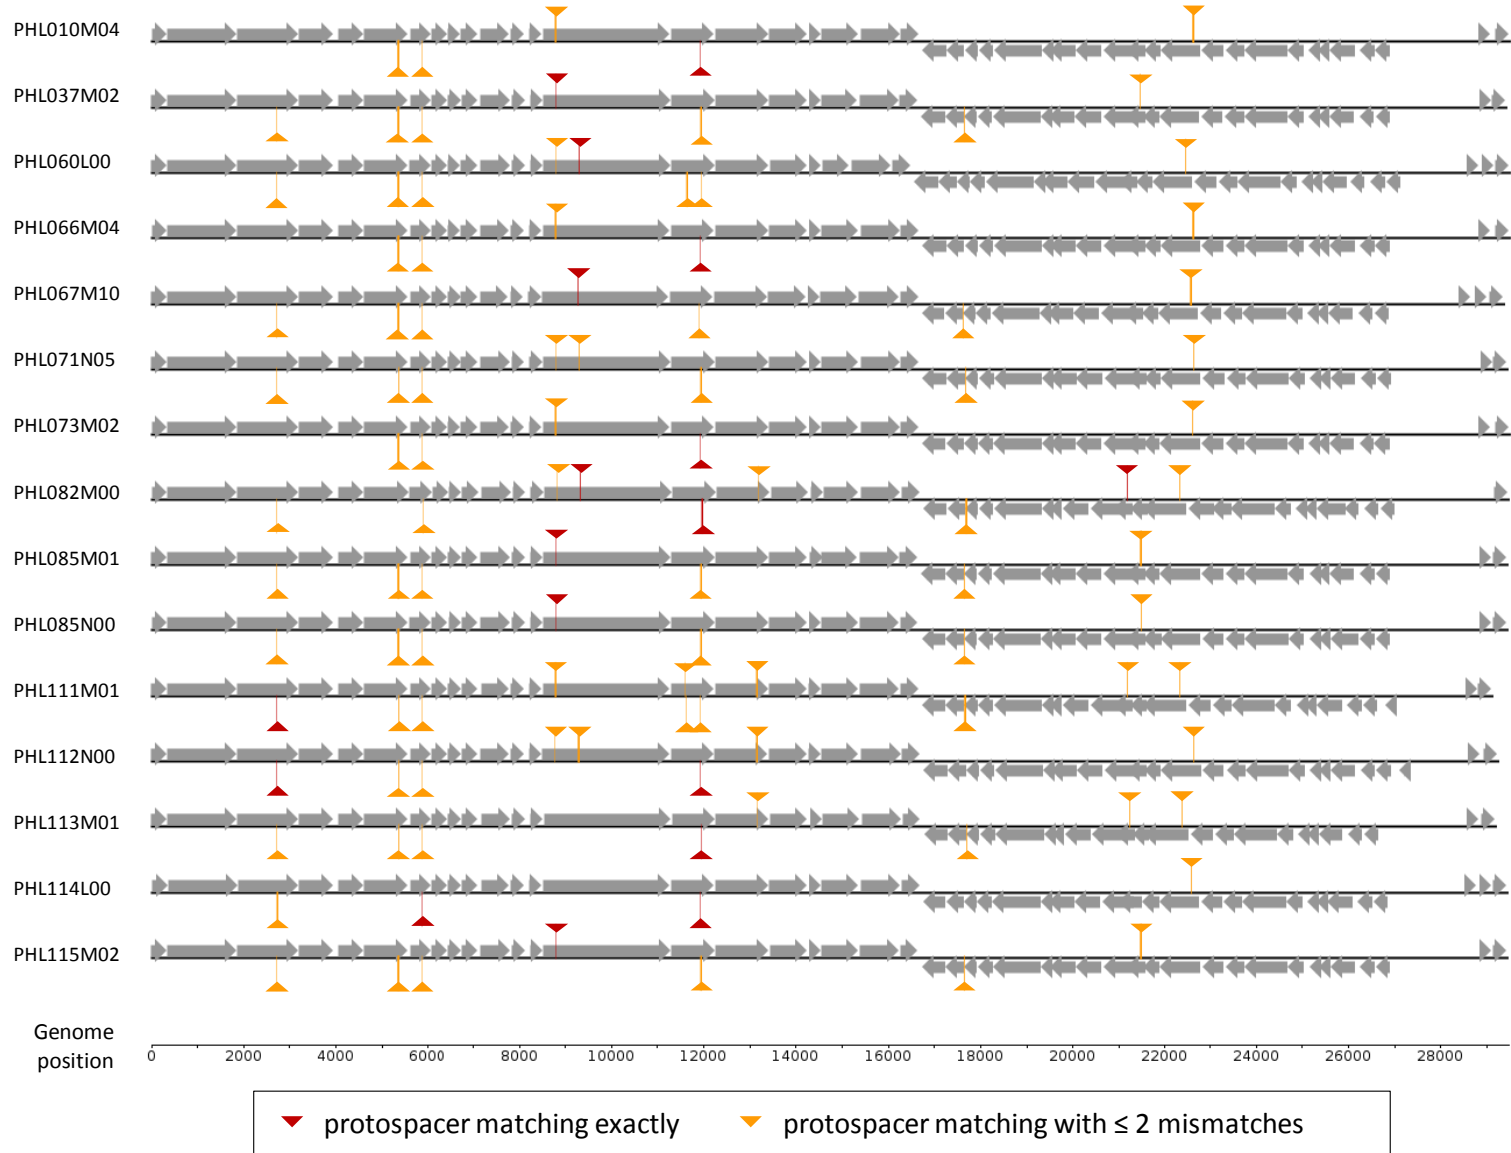

**Figure S7. Protospacers identified in the phage genomes are mainly located in the left arm region.**

Each of the 15 sequenced and tested phages was aligned to all CRISPR spacers identified in the *P. acnes* strains. Each protospacer sequence in a phage genome is shown in red if it is an exact match or in orange if it contains up to two mismatches. Plus- and minus-strand protospacers are shown above and below the genome lines, respectively.

**Table S1. Phage genome information and sequencing statistics**

| Phage         | Donor skin | Genome      |      |                | Sequencing method | Sequencing bases (Mb) | Sequencing coverage | Assembled  |                   |                        |
|---------------|------------|-------------|------|----------------|-------------------|-----------------------|---------------------|------------|-------------------|------------------------|
|               |            | length (bp) | GC%  | Number of ORFs |                   |                       |                     | bases (Mb) | Assembly coverage | Assembly polymorphisms |
| PHL009M11     | healthy    | 29,503      | 53.9 | 45             | MiSeq             | 1.5                   | 50x                 | 1.1        | 39x               | 3                      |
| PHL010M04     | healthy    | 29,511      | 54.0 | 46             | 454               | 1.7                   | 57x                 | 1.7        | 57x               | 0                      |
| PHL025M00     | healthy    | 29,496      | 54.0 | 43             | MiSeq             | 5.1                   | 174x                | 5.1        | 174x              | 2                      |
| PHL030N00     | healthy    | 29,424      | 53.9 | 45             | MiSeq             | 4.7                   | 158x                | 4.7        | 158x              | 9                      |
| PHL037M02     | healthy    | 29,443      | 53.8 | 44             | 454               | 3.1                   | 105x                | 3.1        | 105x              | 2                      |
| PHL041M10     | healthy    | 29,412      | 54.3 | 45             | MiSeq             | 1.6                   | 55x                 | 1.6        | 55x               | 2                      |
| PHL055N00     | healthy    | 29,264      | 54.2 | 45             | MiSeq             | 1.7                   | 58x                 | 1.7        | 58x               | 0                      |
| PHL060L00     | acne       | 29,514      | 54.0 | 46             | 454/MiSeq         | 29.6                  | 1,002x              | 12.0       | 407x              | 7                      |
| PHL064M01     | healthy    | 29,424      | 53.9 | 46             | MiSeq             | 2.6                   | 88x                 | 2.6        | 88x               | 0                      |
| PHL064M02     | healthy    | 29,407      | 53.9 | 46             | MiSeq             | 3.3                   | 112x                | 3.3        | 112x              | 0                      |
| PHL066M04     | healthy    | 29,512      | 54.0 | 46             | 454               | 2.4                   | 80x                 | 2.4        | 80x               | 0                      |
| PHL067M01     | acne       | 29,377      | 54.3 | 46             | MiSeq             | 1.8                   | 61x                 | 1.8        | 61x               | 0                      |
| PHL067M09     | acne       | 29,386      | 54.3 | 46             | MiSeq             | 3.7                   | 128x                | 3.7        | 128x              | 0                      |
| PHL067M10     | acne       | 29,377      | 54.3 | 46             | 454               | 2.3                   | 79x                 | 2.3        | 79x               | 1                      |
| PHL070N00     | healthy    | 29,421      | 54.0 | 44             | MiSeq             | 4.8                   | 163x                | 4.8        | 163x              | 0                      |
| PHL071N05     | healthy    | 29,467      | 53.9 | 44             | 454               | 3.1                   | 104x                | 3.1        | 104x              | 7                      |
| PHL073M02     | healthy    | 29,503      | 54.0 | 46             | 454               | 2.5                   | 86x                 | 2.5        | 86x               | 1                      |
| PHL082M00     | acne       | 29,491      | 54.4 | 46             | MiSeq             | 121.9                 | 4,132x              | 3.3        | 112x              | 10                     |
| PHL082M02     | acne       | 29,492      | 54.4 | 46             | MiSeq             | 12.3                  | 417x                | 12.3       | 417x              | 3                      |
| PHL082M03     | acne       | 29,491      | 54.4 | 46             | MiSeq             | 3.2                   | 107x                | 3.2        | 107x              | 2                      |
| PHL082M04     | acne       | 29,502      | 54.4 | 46             | MiSeq             | 9.2                   | 312x                | 9.2        | 312x              | 1                      |
| PHL085M01     | healthy    | 29,451      | 53.8 | 44             | 454               | 26.1                  | 887x                | 12.6       | 426x              | 4                      |
| PHL085N00     | healthy    | 29,454      | 53.8 | 44             | MiSeq             | 74.4                  | 2,525x              | 3.9        | 133x              | 11                     |
| PHL092M00     | acne       | 29,262      | 53.9 | 45             | MiSeq             | 3.3                   | 114x                | 3.3        | 114x              | 1                      |
| PHL095N00     | acne       | 29,752      | 54.0 | 45             | MiSeq             | 3.6                   | 121x                | 3.6        | 121x              | 0                      |
| PHL111M01     | healthy    | 29,140      | 54.3 | 45             | 454               | 2.9                   | 98x                 | 2.9        | 98x               | 0                      |
| PHL112N00     | acne       | 29,266      | 54.5 | 45             | 454/MiSeq         | 26.7                  | 911x                | 12.3       | 419x              | 11                     |
| PHL113M01     | healthy    | 29,200      | 54.1 | 44             | 454               | 2.2                   | 77x                 | 2.2        | 77x               | 4                      |
| PHL114L00     | acne       | 29,464      | 54.2 | 45             | 454/MiSeq         | 13.0                  | 440x                | 12.3       | 416x              | 6                      |
| PHL114N00     | acne       | 29,464      | 54.2 | 45             | MiSeq             | 2.1                   | 71x                 | 2.1        | 71x               | 0                      |
| PHL115M02     | healthy    | 29,453      | 53.8 | 44             | 454               | 4.7                   | 159x                | 4.7        | 159x              | 1                      |
| PHL116M00     | healthy    | 29,394      | 54.0 | 46             | MiSeq             | 6.0                   | 203x                | 1.2        | 42x               | 1                      |
| PHL116M10     | healthy    | 29,396      | 54.0 | 46             | MiSeq             | 5.4                   | 184x                | 5.4        | 184x              | 6                      |
| PHL117M00     | acne       | 29,255      | 54.2 | 45             | MiSeq             | 1.7                   | 58x                 | 1.7        | 58x               | 0                      |
| PHL117M01     | acne       | 29,422      | 53.9 | 46             | MiSeq             | 54.3                  | 1,845x              | 6.8        | 231x              | 1                      |
| PHL132N00     | acne       | 29,003      | 54.3 | 42             | MiSeq             | 1.9                   | 66x                 | 1.9        | 66x               | 2                      |
| PHL141N00     | acne       | 29,494      | 53.9 | 45             | MiSeq             | 1.9                   | 64x                 | 1.9        | 64x               | 2                      |
| PHL150M00     | healthy    | 29,439      | 54.2 | 45             | MiSeq             | 27.4                  | 932x                | 27.4       | 932x              | 0                      |
| PHL151M00     | healthy    | 29,511      | 54.0 | 46             | MiSeq             | 6.0                   | 203x                | 6.0        | 203x              | 0                      |
| PHL151N00     | healthy    | 29,511      | 54.0 | 46             | MiSeq             | 4.2                   | 141x                | 4.2        | 141x              | 0                      |
| PHL152M00     | acne       | 29,247      | 54.2 | 45             | MiSeq             | 266.7                 | 9,120x              | 266.7      | 9,120x            | 0                      |
| PHL163M00     | healthy    | 29,264      | 54.2 | 46             | MiSeq             | 2.0                   | 69x                 | 2.0        | 69x               | 0                      |
| PHL171M01     | healthy    | 29,328      | 53.7 | 45             | MiSeq             | 132.0                 | 4,500x              | 132.0      | 4,500x            | 2                      |
| PHL179M00     | acne       | 29,428      | 53.9 | 45             | MiSeq             | 6.1                   | 207x                | 6.1        | 207x              | 1                      |
| PHL194M00     | acne       | 29,264      | 54.2 | 45             | MiSeq             | 1.6                   | 53x                 | 1.6        | 53x               | 0                      |
| PHL199M00     | healthy    | 29,806      | 54.0 | 45             | MiSeq             | 4.8                   | 161x                | 4.8        | 161x              | 4                      |
| PHL301M00     | acne       | 29,323      | 54.4 | 45             | MiSeq             | 5.6                   | 191x                | 5.6        | 191x              | 0                      |
| PHL308M00     | healthy    | 29,442      | 54.2 | 45             | MiSeq             | 7.3                   | 247x                | 7.3        | 247x              | 1                      |
| <b>Median</b> |            | 29,434      | 54.0 | 45             |                   | 4.0                   | 135x                | 3.5        | 118x              | 1                      |

**Table S2. Relationships among the phages in groups I-IX**

| Group | Phage                  | Isolated from the same sample of the same individual | Isolated from the same individual at different times | Isolated from different individuals | Isolated from related individuals | Maximum nucleotide variations within group |
|-------|------------------------|------------------------------------------------------|------------------------------------------------------|-------------------------------------|-----------------------------------|--------------------------------------------|
| I     | PHL067M01              | X                                                    |                                                      |                                     |                                   | 1                                          |
|       | PHL067M09              | X                                                    |                                                      |                                     |                                   |                                            |
|       | PHL067M10              | X                                                    |                                                      |                                     |                                   |                                            |
| II    | PHL082M00              | X                                                    |                                                      |                                     |                                   | 5                                          |
|       | PHL082M02              | X                                                    |                                                      |                                     |                                   |                                            |
|       | PHL082M03              | X                                                    |                                                      |                                     |                                   |                                            |
|       | PHL082M04              | X                                                    |                                                      |                                     |                                   |                                            |
| III   | PHL055N00              |                                                      |                                                      |                                     |                                   | 1                                          |
|       | PHL117M00              |                                                      |                                                      | X                                   |                                   |                                            |
|       | PHL163M00              |                                                      |                                                      |                                     |                                   |                                            |
|       | PHL194M00              |                                                      |                                                      |                                     |                                   |                                            |
| IV    | PHL150M00              |                                                      |                                                      | X                                   | X                                 | 14                                         |
|       | PHL308M00              |                                                      |                                                      |                                     | X                                 |                                            |
| V     | PHL064M01              | X                                                    |                                                      |                                     |                                   | 12                                         |
|       | PHL064M02              | X                                                    |                                                      | X                                   |                                   |                                            |
|       | PHL117M01              |                                                      |                                                      |                                     |                                   |                                            |
|       | PHL030N00              |                                                      |                                                      |                                     |                                   |                                            |
| VI    | PHL115M02              |                                                      |                                                      |                                     |                                   | 8                                          |
|       | PHL085M01              |                                                      | X                                                    | X                                   |                                   |                                            |
|       | PHL085N00              |                                                      | X (4 months later)                                   |                                     |                                   |                                            |
| VII   | PHL114L00              |                                                      | X                                                    |                                     |                                   | 8                                          |
|       | PHL114N00              |                                                      | X (3 months later)                                   |                                     |                                   |                                            |
| VIII  | PHL151M00              |                                                      | X                                                    |                                     |                                   | 10                                         |
|       | PHL151N00              |                                                      | X (5 months later)                                   |                                     |                                   |                                            |
|       | PHL010M04              |                                                      |                                                      | X                                   | X                                 |                                            |
|       | PHL066M04              |                                                      |                                                      |                                     | X                                 |                                            |
|       | PHL073M02 <sup>1</sup> |                                                      |                                                      |                                     | X                                 |                                            |
| IX    | PHL116M00              | X                                                    |                                                      |                                     |                                   | 4                                          |
|       | PHL116M10              | X                                                    |                                                      |                                     |                                   |                                            |

<sup>1</sup>This phage is not a member of Group VIII based on our criterion but shows a high genetic similarity to Group VIII members.

**Table S3. *P. acnes* phage reads in the skin microbiome data from HMP**

| <b>Sample</b> | <b>Retroauricular crease</b> | <b>Total number of sequenced reads</b> | <b>Mappable <i>P. acnes</i> phage reads</b> | <b>Percentage of phage reads in sample</b> | <b>Estimated coverage of phage genome</b> | <b>Percentage of phage reads assembled</b> |
|---------------|------------------------------|----------------------------------------|---------------------------------------------|--------------------------------------------|-------------------------------------------|--------------------------------------------|
| HMP09         | right                        | 61,912,421                             | 612,512                                     | 0.9890%                                    | 2,060x                                    | 99.6%                                      |
| HMP04         | left                         | 76,307,200                             | 435,067                                     | 0.5700%                                    | 1,463x                                    | 99.6%                                      |
| HMP15         | right                        | 68,504,708                             | 299,707                                     | 0.4370%                                    | 1,008x                                    | 99.7%                                      |
| HMP20         | right                        | 9,005,077                              | 160,073                                     | 1.7800%                                    | 538x                                      | -                                          |
| HMP08         | left                         | 15,217,789                             | 6,430                                       | 0.0423%                                    | 22x                                       | -                                          |
| HMP03         | right                        | 55,078,145                             | 6,371                                       | 0.0116%                                    | 21x                                       | -                                          |
| HMP24         | right                        | 26,584,816                             | 5,166                                       | 0.0194%                                    | 17x                                       | -                                          |
| HMP19         | right                        | 24,662,865                             | 2,920                                       | 0.0118%                                    | 10x                                       | -                                          |
| HMP14         | right                        | 14,343,937                             | 2,278                                       | 0.0159%                                    | 8x                                        | -                                          |
| HMP05         | left                         | 6,977,560                              | 2,086                                       | 0.0299%                                    | 7x                                        | -                                          |
| HMP12         | right                        | 11,463,286                             | 1,778                                       | 0.0155%                                    | 6x                                        | -                                          |
| HMP01         | right                        | 54,571,597                             | 1,124                                       | 0.0021%                                    | 4x                                        | -                                          |
| HMP11         | right                        | 18,789,759                             | 1,105                                       | 0.0059%                                    | 4x                                        | -                                          |
| HMP23         | left                         | 4,970,921                              | 924                                         | 0.0186%                                    | 3x                                        | -                                          |
| HMP22         | right                        | 9,248,315                              | 903                                         | 0.0098%                                    | 3x                                        | -                                          |
| HMP10         | right                        | 47,468,302                             | 444                                         | 0.0009%                                    | 1x                                        | -                                          |
| HMP07         | left                         | 40,649,268                             | 403                                         | 0.0010%                                    | 1x                                        | -                                          |
| HMP17         | left                         | 23,548,107                             | 350                                         | 0.0015%                                    | 1x                                        | -                                          |
| HMP26         | left                         | 43,795,837                             | 188                                         | 0.0004%                                    | 1x                                        | -                                          |
| HMP06         | right                        | 17,284,054                             | 172                                         | 0.0010%                                    | 1x                                        | -                                          |
| HMP18         | right                        | 20,952,929                             | 131                                         | 0.0006%                                    | 0x                                        | -                                          |
| HMP27         | right                        | 11,501,845                             | 118                                         | 0.0010%                                    | 0x                                        | -                                          |
| HMP25         | right                        | 17,024,554                             | 111                                         | 0.0007%                                    | 0x                                        | -                                          |
| HMP21         | right                        | 7,432,395                              | 72                                          | 0.0010%                                    | 0x                                        | -                                          |
| HMP02         | left                         | 5,742,482                              | 34                                          | 0.0006%                                    | 0x                                        | -                                          |
| HMP16         | left                         | 3,485,645                              | 32                                          | 0.0009%                                    | 0x                                        | -                                          |
| HMP13         | right                        | 3,000,119                              | 24                                          | 0.0008%                                    | 0x                                        | -                                          |
